# Supplementary material for: Co-assembled Ca2+ Alginate-Sulfate Nanoparticles for Intracellular Plasmid DNA Delivery
Source: PubMed Central journal article supplement — Mol Ther Nucleic Acids. 2019 Mar 28;16:378–90. doi: 10.1016/j.omtn.2019.03.006 (PMC6475713; doi:10.1016/j.omtn.2019.03.006), 2019-03-28
Supplement: mmc1.pdf [file mmc1.pdf]

**OMTN, Volume 16**

**Supplemental Information**

**Co-assembled Ca<sup>2+</sup> Alginate-Sulfate**

**Nanoparticles for Intracellular**

**Plasmid DNA Delivery**

**Matan Goldshtein, Stav Shamir, Ekaterina Vinogradov, Alon Monsonego, and Smadar Cohen**

1 **Supplementary Information**

2

3 **Co-assembled Ca<sup>2+</sup> alginate-sulfate nanoparticles for intracellular**  
4 **plasmid DNA delivery**

5

6 **Matan Goldshtein<sup>1</sup>, Stav Shamir<sup>1</sup>, Ekaterina Vinogradov<sup>2</sup>, Alon**  
7 **Monsonogo<sup>2,3</sup>, Smadar Cohen<sup>1,3,4></sup>**

8

9 <sup>1</sup>Avram and Stella Goldstein-Goren Department of Biotechnology Engineering, Ben-Gurion  
10 University of the Negev, Beer-Sheva, Israel

11 <sup>2</sup>Shraga Segal Department of Microbiology, Immunology, and Genetics, Faculty of Health  
12 Sciences, The National Institute of Biotechnology in the Negev, and Zlotowski Center for  
13 Neuroscience, Ben-Gurion University of the Negev, Beer-Sheva, Israel

14 <sup>3</sup>Regenerative Medicine and Stem Cell (RMSC) Research Center, Ben-Gurion University of the  
15 Negev, Beer-Sheva, Israel

16 <sup>4</sup>The Ilse Katz Institute for Nanoscale Science and Technology, Ben-Gurion University of the  
17 Negev, Beer-Sheva, Israel

18 \*Authors contributed equally

19 >Corresponding author:

20 Smadar Cohen, Avram and Stella Goldstein-Goren Department of Biotechnology Engineering,  
21 Ben-Gurion University of the Negev, Beer-Sheva, POB 653, 8410501, Israel, E-mail:  
22 [scohen@bgu.ac.il](mailto:scohen@bgu.ac.il), Tel: +972-8-6461798, Fax: +972-8-6472915

## 23 Supplementary tables

24 **Table S1. XPS analysis.** Binding energies of C, N, O, P, Ca and S in AlgS-Ca<sup>2+</sup>-pDNA NPs vs.  
25 complexes of Ca<sup>2+</sup>-pDNA

| Sample                          | Binding energy [eV] |       |       |       |       |       |
|---------------------------------|---------------------|-------|-------|-------|-------|-------|
|                                 | C1s                 | N1s   | O1s   | P2p   | Ca2p  | S2p   |
| Ca <sup>2+</sup> -pDNA complex  | 284.8               | 399.3 | 532.7 | 133.6 | 348.0 | N/A   |
| AlgS-Ca <sup>2+</sup> -pDNA NPs | 284.7               | 399.7 | 532.5 | 134.5 | 348.0 | 168.8 |

26

## 27 Supplementary figures

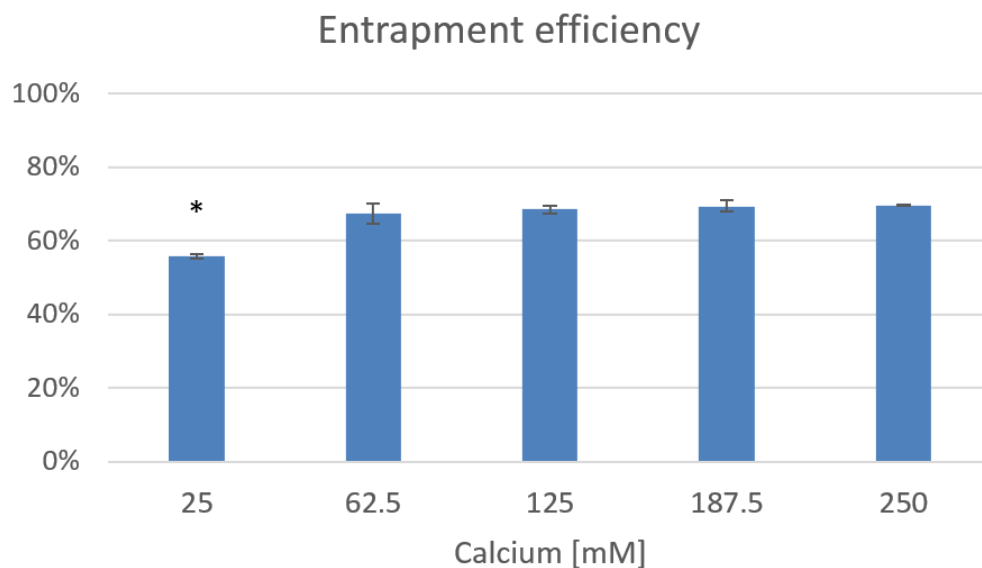

28

29 **Fig. S1. The entrapment efficiencies of AlgS-Ca<sup>2+</sup>-pDNA NPs with different calcium ion**  
30 **concentrations in the particle.** The entrapment efficiency in NPs with 25 mM is statistically-  
31 significant lower than in NPs with greater Ca<sup>2+</sup> concentrations (p<0.05). There is no change in  
32 efficiency for concentrations higher than 62.5 mM. Error bars represent SEM (n = 3)

33

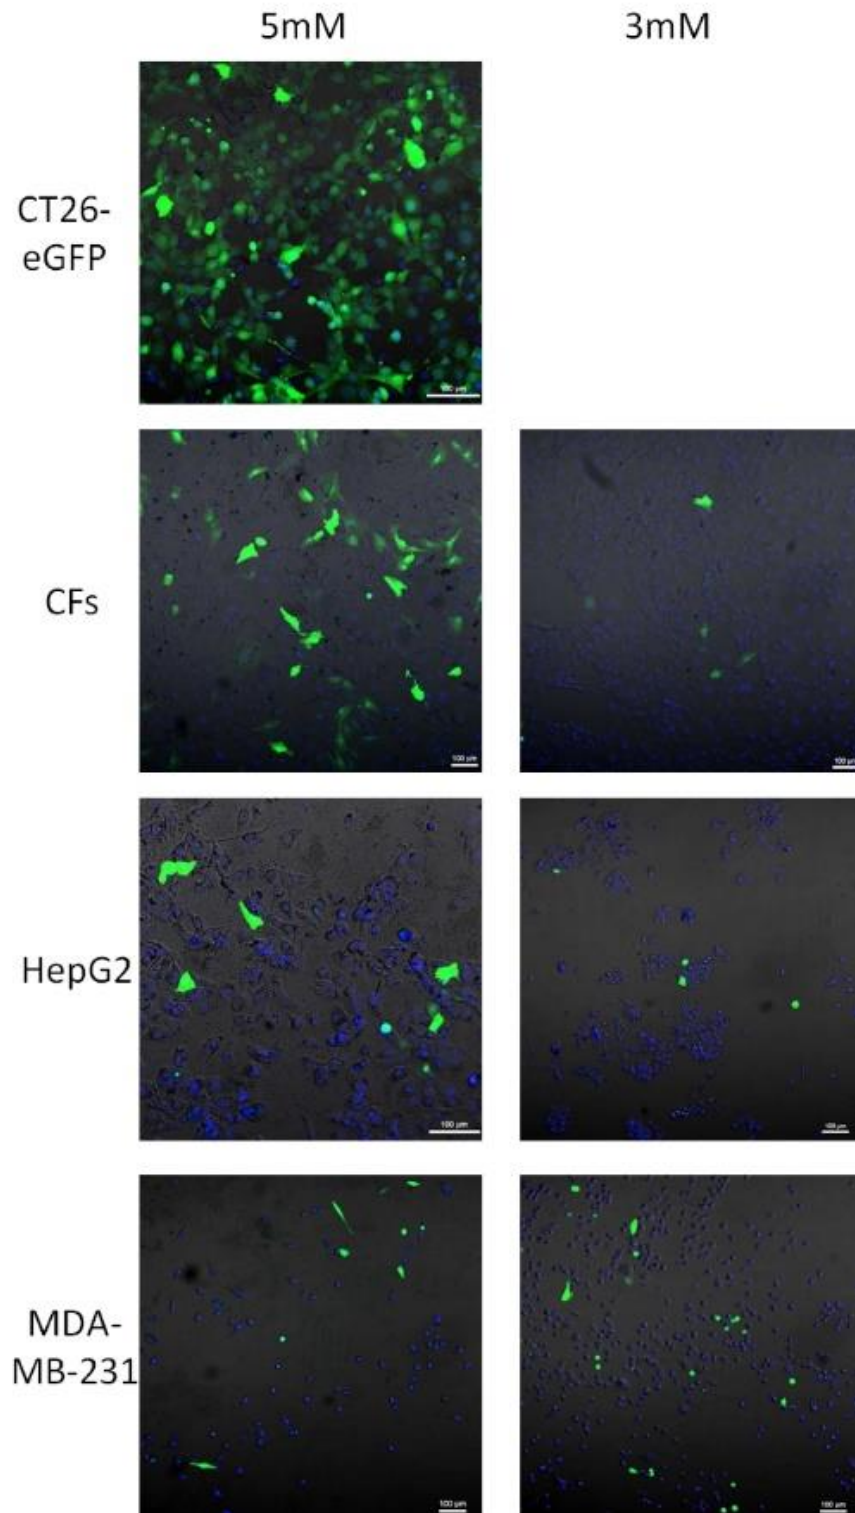

34

35 **Figure S2. LSCM images of GFP expression** by different cells transfected with different  $\text{Ca}^{2+}$

36 concentration based pDNA nanoparticles. Nuclei are in blue and GFP is in green.
